# Supplementary material for: Glucose Control and Vascular Complications in Veterans with Type 2 Diabetes
Source: Atypon-hosted journal article supplement (doi:10.1056/nejmoa0808431), 2008-12-17
Supplement: nejm_duckworth_129sa1.pdf [file nejm_duckworth_129sa1.pdf]

## Supplementary Appendix

This appendix has been provided by the authors to give readers additional information about their work.

Supplement to: Duckworth W, Abaira C, Moritz T, et al. Glucose control and vascular complications in veterans with type 2 diabetes. *N Engl J Med* 2009;360:129-39. DOI: 10.1056/NEJMoa0808431.

(PDF updated September 2, 2009.)

## Supplementary Appendix 1

### Time to Primary Event

| Primary Event                       | Treatment | # of Events | 6-Year Event-free Rate | p-value (Log rank) | Hazard Ratio | Lower CL | Upper CL |
|-------------------------------------|-----------|-------------|------------------------|--------------------|--------------|----------|----------|
| <b>First Primary Event</b>          | Standard  | 264         | 0.66                   | 0.14               | 0.88         | 0.74     | 1.05     |
|                                     | Intensive | 235         | 0.70                   |                    |              |          |          |
| <b>MI</b>                           | Standard  | 78          | 0.90                   | 0.24               | 0.82         | 0.59     | 1.14     |
|                                     | Intensive | 64          | 0.91                   |                    |              |          |          |
| <b>CHF</b>                          | Standard  | 82          | 0.89                   | 0.57               | 0.91         | 0.67     | 1.25     |
|                                     | Intensive | 76          | 0.90                   |                    |              |          |          |
| <b>Stroke</b>                       | Standard  | 36          | 0.95                   | 0.32               | 0.78         | 0.48     | 1.28     |
|                                     | Intensive | 28          | 0.96                   |                    |              |          |          |
| <b>Coronary Revascularization</b>   | Standard  | 127         | 0.83                   | 0.19               | 0.84         | 0.65     | 1.09     |
|                                     | Intensive | 107         | 0.86                   |                    |              |          |          |
| <b>Peripheral Revascularization</b> | Standard  | 23          | 0.97                   | 0.66               | 0.87         | 0.48     | 1.59     |
|                                     | Intensive | 20          | 0.97                   |                    |              |          |          |
| <b>Cerebro-revascularization</b>    | Standard  | 15          | 0.98                   | 0.86               | 0.94         | 0.45     | 1.94     |
|                                     | Intensive | 14          | 0.98                   |                    |              |          |          |
| <b>Amputation</b>                   | Standard  | 17          | 0.98                   | 0.26               | 0.65         | 0.31     | 1.39     |
|                                     | Intensive | 11          | 0.98                   |                    |              |          |          |
| <b>Inoperable CAD</b>               | Standard  | 8           | 0.98                   | 0.35               | 1.52         | 0.62     | 3.72     |
|                                     | Intensive | 12          | 0.98                   |                    |              |          |          |
| <b>CV Death</b>                     | Standard  | 29          | 0.96                   | 0.26               | 1.32         | 0.81     | 2.14     |
|                                     | Intensive | 38          | 0.95                   |                    |              |          |          |

Results of analysis of composite primary endpoint and each component of the composite.

**Supplementary Appendix 2**

**Time to Secondary Cardiovascular Events and Total Mortality**

| Secondary Event     | Treatment | # of Events | 6-Year Event-free Rate | p-value (Log rank) | Hazard Ratio | Lower CL | Upper CL |
|---------------------|-----------|-------------|------------------------|--------------------|--------------|----------|----------|
| Angina              | Standard  | 139         | 0.82                   | 0.11               | 1.20         | 0.96     | 1.51     |
|                     | Intensive | 163         | 0.79                   |                    |              |          |          |
| CLI*                | Standard  | 19          | 0.97                   | 0.51               | 0.80         | 0.40     | 1.56     |
|                     | Intensive | 15          | 0.98                   |                    |              |          |          |
| IC**                | Standard  | 17          | 0.98                   | 0.49               | 0.78         | 0.38     | 1.60     |
|                     | Intensive | 13          | 0.98                   |                    |              |          |          |
| TIA***              | Standard  | 13          | 0.98                   | 0.28               | 1.48         | 0.73     | 2.99     |
|                     | Intensive | 19          | 0.97                   |                    |              |          |          |
| All Cause Mortality | Standard  | 95          | 0.88                   | 0.62               | 1.07         | 0.81     | 1.42     |
|                     | Intensive | 102         | 0.87                   |                    |              |          |          |

Abbreviations: \* CLI= critical limb ischemia, \*\* IC=intermittent Claudication,  
\*\*\*TIA= transient ischemic attacks

**Results of Secondary Macrovascular Events with Treatment**

### Supplementary Appendix 3

#### Cause of Cardiovascular Death

|                                            | Treatment |     |           |     | Total |     |
|--------------------------------------------|-----------|-----|-----------|-----|-------|-----|
|                                            | Standard  |     | Intensive |     | Total |     |
|                                            | N         | %   | N         | %   | N     | %   |
| <b>Myocardial infarction</b>               | 12        | 1.3 | 13        | 1.5 | 25    | 1.4 |
| <b>Congestive heart failure</b>            | 9         | 1.0 | 8         | 0.9 | 17    | 0.9 |
| <b>Coronary Revascularization</b>          | 0         | 0   | 1         | 0.1 | 1     | 0.1 |
| <b>Stroke</b>                              | 4         | 0.4 | 6         | 0.7 | 10    | 0.6 |
| <b>Cerebrovascularization</b>              | 1         | 0.1 | 0         | 0   | 1     | 0.1 |
| <b>Complications of Occlusions</b>         | 1         | 0.1 | 0         | 0   | 1     | 0.1 |
| <b>Peripheral Revascularization</b>        | 1         | 0.1 | 1         | 0.1 | 2     | 0.1 |
| <b>Sudden Death (p=0.07)</b>               | 4         | 0.4 | 11        | 1.2 | 15    | 0.8 |
| <b>Pulmonary Embolism</b>                  | 1         | 0.1 | 0         | 0   | 1     | 0.1 |
| <b>Total Cardiovascular death (p=0.29)</b> | 33        | 3.7 | 40        | 4.5 | 73    | 4.1 |

Total Cardiovascular Deaths and Individual Causes. All results are non-significant.

## Supplementary Appendix 4A

### Cause of Death: Neoplasm (Non-cardiovascular)

|                          | Treatment |     |           |     | Total |     |
|--------------------------|-----------|-----|-----------|-----|-------|-----|
|                          | Standard  |     | Intensive |     |       |     |
|                          | N         | %   | N         | %   | N     | %   |
| <b>Neoplasm</b>          | 2         | 0.2 | 3         | 0.3 | 5     | 0.3 |
| <b>Lung cancer</b>       | 7         | 0.8 | 6         | 0.7 | 13    | 0.7 |
| <b>Liver cancer</b>      | 2         | 0.2 | 1         | 0.1 | 3     | 0.2 |
| <b>Renal cancer</b>      | 1         | 0.1 | 3         | 0.3 | 4     | 0.2 |
| <b>Colon cancer</b>      | 2         | 0.2 | 4         | 0.4 | 6     | 0.3 |
| <b>Bile duct cancer</b>  | 0         | 0   | 1         | 0.1 | 1     | 0.1 |
| <b>Prostate cancer</b>   | 0         | 0   | 1         | 0.1 | 1     | 0.1 |
| <b>Pancreatic cancer</b> | 1         | 0.1 | 4         | 0.4 | 5     | 0.3 |
| <b>Lymphatic cancer</b>  | 2         | 0.2 | 0         | 0   | 2     | 0.1 |
| <b>Other</b>             | 4         | 0.4 | 1         | 0.1 | 5     | 0.3 |
| <b>Total Neoplasm</b>    | 21        | 2.3 | 24        | 2.7 | 45    | 2.5 |

All results are non-significant

**Supplementary Appendix 4B**

**Other Causes of Death (Non-cardiovascular)**

|                                                  | Treatment |            |           |            | Total     |            |
|--------------------------------------------------|-----------|------------|-----------|------------|-----------|------------|
|                                                  | Standard  |            | Intensive |            |           |            |
|                                                  | N         | %          | N         | %          | N         | %          |
|                                                  |           |            |           |            |           |            |
| <b>Infection</b>                                 | 3         | 0.3        | 3         | 0.3        | 6         | 0.3        |
| <b>Unknown</b>                                   | 14        | 1.6        | 6         | 0.7        | 20        | 1.1        |
| <b>Suicide</b>                                   | 3         | 0.3        | 3         | 0.3        | 6         | 0.3        |
| <b>Pancreatitis and complications</b>            | 1         | 0.1        | 2         | 0.2        | 3         | 0.2        |
| <b>Acute morphine and temazepam intoxication</b> | 1         | 0.1        | 1         | 0.1        | 2         | 0.1        |
| <b>Renal failure</b>                             | 3         | 0.3        | 2         | 0.2        | 5         | 0.3        |
| <b>Respiratory failure</b>                       | 5         | 0.6        | 7         | 0.8        | 12        | 0.7        |
| <b>Other</b>                                     | 11        | 1.2        | 14        | 1.6        | 25        | 1.4        |
| <b>Total non-CV, non-neoplastic deaths</b>       | <b>41</b> | <b>4.6</b> | <b>38</b> | <b>4.3</b> | <b>79</b> | <b>4.4</b> |

Non cardiovascular and non-neoplastic causes of death. All non-significant.

**Supplementary Appendix 5**

### Reporting of Confirmed SAE at least once during follow-up\*

| Number of patients reporting Serious Adverse Events                 | Standard |       | Intensive |       | P-value |
|---------------------------------------------------------------------|----------|-------|-----------|-------|---------|
|                                                                     | N        | %     | N         | %     |         |
| <b>ALL</b>                                                          | 899      | 100.0 | 892       | 100.0 |         |
| <b>never reported</b>                                               | 741      | 82.4  | 677       | 75.9  | 0.001   |
| <b>dyspnea SAE</b>                                                  | 65       | 7.2   | 98        | 11.0  | 0.006   |
| <b>hypoglycemia SAE</b>                                             | 28       | 3.1   | 76        | 8.5   | 0.000   |
| <b>edema SAE</b>                                                    | 46       | 5.1   | 58        | 6.5   | 0.210   |
| <b>altered consciousness (not associated with hypoglycemia) SAE</b> | 27       | 3.0   | 28        | 3.1   | 0.868   |
| <b>weakness/numbness of limb(s) SAE</b>                             | 17       | 1.9   | 25        | 2.8   | 0.202   |
| <b>nausea SAE</b>                                                   | 18       | 2.0   | 22        | 2.5   | 0.506   |
| <b>vomiting SAE</b>                                                 | 15       | 1.7   | 20        | 2.2   | 0.381   |
| <b>upper respiratory infection SAE</b>                              | 13       | 1.4   | 19        | 2.1   | 0.275   |
| <b>vertigo SAE</b>                                                  | 11       | 1.2   | 14        | 1.6   | 0.533   |
| <b>diarrhea SAE</b>                                                 | 6        | 0.7   | 13        | 1.5   | 0.103   |
| <b>blurred or double vision SAE</b>                                 | 7        | 0.8   | 13        | 1.5   | 0.172   |
| <b>hyperglycemia SAE</b>                                            | 15       | 1.7   | 11        | 1.2   | 0.441   |
| <b>newly appearing or worsening headaches SAE</b>                   | 9        | 1.0   | 11        | 1.2   | 0.640   |
| <b>neuropathic ulcer SAE</b>                                        | 9        | 1.0   | 6         | 0.7   | 0.446   |
| <b>dysphasia SAE</b>                                                | 5        | 0.6   | 5         | 0.6   | 1.000   |
| <b>ataxia SAE</b>                                                   | 8        | 0.9   | 4         | 0.4   | 0.252   |
| <b>dysarthria SAE</b>                                               | 4        | 0.4   | 4         | 0.4   | 1.000   |
| <b>pruritus SAE</b>                                                 | 0        | 0     | 2         | 0.2   | 0.248   |
| <b>skin ulcers (other than extremity ulcers) SAE</b>                | 5        | 0.6   | 2         | 0.2   | 0.452   |
| <b>erectile/sexual dysfunction SAE</b>                              | 1        | 0.1   | 1         | 0.1   | 1.000   |
| <b>jaundice SAE</b>                                                 | 2        | 0.2   | 1         | 0.1   | 1.000   |
| <b>rash SAE</b>                                                     | 1        | 0.1   | 1         | 0.1   | 1.000   |
| <b>nystagmus SAE</b>                                                | 1        | 0.1   | 0         | 0     | 1.000   |

\*SAE: Life threatening, death, hospitalization, disability or incapacity, cancer or other important event requiring medical intervention/treatment.
